# Supplementary material for: Community structures and taphonomic controls on benthic foraminiferal community from an Antarctic Fjord (Edisto Inlet, Victoria Land)
Source: Copernicus journal article supplement (doi:10.5194/bg-23-1137-2026), 2026-02-06
Supplement: Supplementary file 1 [file Foraminifera_counts.xlsx]

## Sheet: Thanatocenosis
Site	Depth Interval	Depth	Split	Dry wieght (T)	Globocassidulina biora	Globocassidulina subglobosa	Cassidulinoides porrectus	Astrononion echolsi	Astrononion antarcticus	Pullenia subcarinata	Pullenia quinqueloba	Melonis barleanum	Cibicides refulgens	Cibicides sp.	Ehrenbergina glabra	Fissurina spp.	Parafissurina fusiformis	Stainforthia concava	Fissurina aerlandii	Fursenkoina fusiformis	Paratrochammina tricamerata	Pseudobulimina chapmani	Pseudotrochammina arenacea	Paratrochammina bartrami	Portatrochammina antarctica	Portatrochammina bipolaris	Nonionella iridea	Epistominella exigua	Oolina hexagona	Trifarina angulosa	Saccamina sp.	Psammosphaera fusca	Ioanella tumida	Rosalina globularis	Bolivinellina pseudopunctata	Pseudobolivina antarctica	Spiroplectammina biformis	Cribrostomoides jeffreysii	Miliammina arenacea	Pyrgo elongata	Adercotryma glomeratum	Recurvoides spp.	Recurvoides contortus	Usbekistania sp.	Lagena substriata elongata	Lagenammina spp.	Ammovertellina sp.	Glomospira charoides	Ammodiscus incertus
34	0-1	0.5	1	0.7132	56	11	0	0	0	0	0	0	0	1	1	0	0	0	0	2	0	0	3	23	11	0	0	6	1	4	0	0	0	1	3	4	0	2	0	0	1	0	0	1	0	0	0	0	1
34	1-2	1.5	1	0.5137	11	7	0	0	0	0	0	0	0	0	0	0	0	0	0	0	0	0	1	6	5	0	0	0	0	0	0	1	0	0	0	1	0	0	0	0	0	0	0	0	0	0	0	0	0
34	2-3	2.5	1	0.4034	3	2	0	0	0	0	0	0	3	0	0	0	0	0	0	0	0	0	0	15	2	0	0	2	0	3	0	2	1	0	0	2	0	3	0	0	1	1	0	0	0	0	0	0	0
34	3-4	3.5	1	0.0631	0	0	0	0	0	0	0	0	0	0	0	0	0	0	0	0	0	0	0	4	0	0	0	0	1	0	0	1	0	0	0	0	0	0	0	0	0	0	0	0	0	0	0	0	0
34	4-5	4.5	1	1.2507	0	1	0	0	0	0	0	0	0	0	2	0	0	0	0	0	0	1	0	5	1	0	0	2	0	0	0	0	0	2	0	0	0	2	0	0	0	1	0	0	0	0	0	0	0
24	0-1	0.5	1	2.309	129	31	4	0	2	0	0	2	0	0	0	2	0	0	0	10	0	0	0	38	25	0	0	0	0	22	0	2	0	2	3	7	0	7	11	1	9	0	0	0	0	3	0	0	3
24	1-2	1.5	1	3.5876	26	30	1	0	0	1	1	1	0	0	0	0	0	0	0	7	0	0	0	34	23	0	0	0	0	4	0	0	0	0	0	8	0	4	11	0	8	0	0	0	0	2	0	0	4
24	2-3	2.5	1	3.6822	6	1	1	0	1	0	0	0	0	0	0	0	0	0	0	0	0	0	0	31	30	0	0	0	0	0	0	1	0	0	3	11	0	5	19	0	12	0	0	0	0	11	0	0	1
24	3-4	3.5	1	3.7273	3	5	3	0	3	0	0	4	0	0	0	0	0	0	0	0	0	0	1	40	32	0	0	1	0	4	0	3	0	0	12	10	0	7	16	0	15	0	0	0	0	5	0	0	5
24	4-5	4.5	1	3.5425	0	0	1	0	0	0	0	0	0	0	0	0	0	0	0	0	0	0	1	35	26	0	0	1	0	2	0	1	0	0	11	11	0	2	12	0	12	0	0	0	0	1	0	0	2
170	0-1	0.5	1	17.5756	117	68	14	0	11	0	1	13	0	0	0	0	1	0	1	0	0	0	0	10	50	12	0	0	0	112	1	2	0	2	0	72	0	30	153	5	13	0	4	0	0	12	0	1	0
170	1-2	1.5	1	14.6812	11	19	0	0	3	3	0	12	0	0	0	0	0	0	0	0	1	0	0	11	54	8	0	0	0	18	0	2	1	0	1	70	1	23	72	0	10	0	6	0	0	16	2	0	8
170	2-3	2.5	1	15.7764	15	8	0	0	2	0	5	3	0	0	0	0	0	0	0	13	3	0	0	9	41	3	1	0	0	20	0	0	0	0	3	70	0	17	108	0	6	0	0	0	0	14	0	0	10
170	3-4	3.5	1	14.3685	4	14	2	0	2	0	0	7	0	0	0	0	0	0	0	8	1	0	0	11	49	15	0	0	0	18	0	0	0	1	5	44	0	14	165	0	15	0	1	0	0	4	1	0	1
170	4-5	4.5	1	16.4673	0	21	7	0	0	0	1	3	0	0	0	0	0	0	0	0	0	0	0	4	15	2	0	0	0	36	0	0	0	0	0	11	0	5	66	0	4	0	1	0	0	2	0	0	1
178	0-1	0.5	1	8.3411	1	2	0	2	0	0	1	0	0	0	0	0	0	0	0	0	10	0	0	33	35	4	0	0	0	2	0	7	0	1	0	74	2	10	45	4	16	0	0	0	0	0	1	0	10
178	1-2	1.5	1	8.0056	0	0	1	3	0	0	0	0	0	0	0	0	0	0	0	4	6	0	0	26	33	11	0	0	0	0	1	4	0	0	1	42	0	13	30	4	10	0	0	0	0	2	0	0	9
178	2-3	2.5	1	7.5231	0	0	0	1	0	0	0	1	0	0	0	0	0	0	0	19	7	0	0	28	19	17	0	0	0	1	0	0	0	0	0	58	0	3	30	0	12	0	0	0	0	1	0	0	3
178	3-4	3.5	1	7.6774	0	0	0	0	0	1	0	0	0	0	0	0	0	0	0	13	2	0	0	43	0	2	0	0	0	0	1	1	0	0	8	43	2	0	28	0	12	0	0	0	0	3	0	0	2
178	4-5	4.5	1	8.2612	1	0	0	2	0	0	0	1	0	0	0	0	0	0	0	7	3	0	0	19	20	2	0	0	0	2	0	0	0	0	0	18	0	2	48	0	7	0	0	0	0	0	0	0	1
180	0-1	0.5	0.75	10.1171	2	9	1	0	4	7	0	22	0	0	1	0	0	1	0	3	0	0	0	20	31	26	2	1	0	17	0	0	0	2	0	71	1	10	39	2	16	0	10	0	0	5	6	0	3
180	1-2	1.5	0.75	9.7071	1	7	1	0	4	6	0	15	0	0	1	0	0	0	0	3	3	0	0	28	31	44	0	0	0	9	0	2	0	0	2	51	0	7	47	0	18	0	4	0	0	2	4	0	1
180	2-3	2.5	1	16.2934	1	5	0	0	1	0	3	1	0	0	0	0	0	0	0	15	8	0	0	46	46	23	0	0	0	31	0	0	0	0	3	26	1	9	79	0	15	0	3	0	0	2	0	0	1
180	3-4	3.5	0.75	11.2758	38	15	3	0	6	1	0	7	0	0	0	0	0	0	0	6	0	0	0	26	25	2	0	0	0	104	0	0	0	1	4	6	0	8	41	0	2	0	0	0	1	0	0	0	2
180	4-5	4.5	0.75	12.9077	45	17	0	0	6	4	1	10	1	0	0	2	0	2	0	2	0	0	0	27	13	0	5	0	0	93	0	0	0	0	3	2	0	3	63	2	2	0	0	0	1	0	0	0	0
[truncated: 11 more columns]

## Sheet: Biocenonosis
Site	Depth Interval	Depth	Astrononion antarcticus	Astrononion echolsi	Bolivinellina pseudopunctata	Cibicides refulgens	Ehrenbergina glabra	Epistominella exigua	Fissurina laevigata	Globocassidulina biora	Cassidulinoides porrectus	Globocassidulina subglobosa	Globocassidulina spp.	Hopkinsina cf. pacifica	Hyalinometrion gracillimum	Melonis affinis	Nonionella bradii	Nonionella iridea	Pullenia quinqueloba	Robertina arctica	Stainforthia feylingi	Trifarina angulosa	Cornuspira planorbis	Miliammina arenacea	Miliolinellina sp.	Pyrgo depressa	Pyrgo oblonga	Pyrgo williamsoni	Quinqueloculina seminula	Quinqueloculina sp.	Quinqueloculina venusta	Triloculina tricamerata	Adercotryma glomeratum	Ammovertellina sp.	Cribrostomoides jeffreysii	Rhumblerella sp.	Glomospira charoides	Lagenammina difflugiformis	Nodulina dentaliniformis	Paratrochammina bartrami	Paratrochammina tricamerata	Portatrochammina antarctica	Psammosphaera fusca	Pseudobolivina antarctica	Recurvoides turbinatus	Reophax scorpiurus	Reophax subfusiformis	Trochammina sp.	Textularia aerlandii
170	0-0.5	0.25	8	0	0	0	2	0	8	42	18	28	0	0	0	0	0	0	2	2	0	252	0	38	0	2	6	0	12	4	0	0	18	6	10	0	0	2	2	0	2	2	0	0	20	2	0	8	0
170	0.5-1	0.75	18	10	0	0	2	2	1	24	8	4	0	0	0	0	0	0	25	0	0	40	2	22	0	0	4	0	4	0	0	0	8	12	12	0	2	1	2	10	2	4	4	14	22	14	1	4	0
170	1-1-5	1.25	8	14	0	0	0	0	0	12	10	6	0	0	0	0	0	0	38	0	0	12	0	14	0	2	4	0	4	0	0	0	0	4	6	0	0	0	22	2	4	10	6	8	10	26	0	2	0
170	1.5-2	1.75	2	2	0	0	0	0	0	14	0	6	0	0	0	0	0	0	8	0	0	8	0	6	0	0	0	0	0	0	0	0	0	0	0	0	0	0	12	2	2	2	0	0	0	2	0	0	0
170	2-3	2.5	0	6	0	0	0	0	0	12	6	4	0	0	0	0	0	0	0	0	0	22	0	4	0	0	0	0	0	0	0	0	6	0	2	0	0	0	12	0	0	2	0	0	4	8	0	0	0
170	3-4	3.5	0	0	0	0	0	0	0	0	0	4	0	0	0	0	0	0	0	0	0	10	0	4	0	0	0	0	0	0	0	0	0	0	2	0	0	0	4	0	0	4	0	0	4	6	0	0	0
170	4-5	4.5	0	0	0	0	0	0	0	4	0	8	0	0	0	0	0	0	0	0	0	4	0	0	0	0	0	0	0	0	0	0	0	0	0	0	0	0	0	0	0	0	0	0	0	0	0	0	0
180	0-0.5	0.25	2	0	0	2	1	0	1	13	0	1	0	1	1	0	0	0	0	0	0	15	0	10	0	0	2	1	4	0	1	2	3	6	13	0	8	0	0	1	7	0	0	3	0	0	0	1	0
180	0.5-1	0.75	1	0	0	0	0	0	1	2	0	0	0	0	0	1	0	0	0	0	0	4	1	3	0	0	3	0	1	0	0	0	1	0	1	0	0	2	0	0	1	4	0	0	1	0	0	1	0
180	1-1-5	1.25	0	0	0	0	0	0	1	0	0	0	0	0	0	3	1	0	0	0	0	2	0	4	0	0	2	0	0	0	0	0	0	1	3	0	0	0	8	0	0	1	0	0	1	0	0	0	0
180	1.5-2	1.75	0	0	0	0	0	0	0	0	0	0	0	0	0	2	0	0	0	0	0	0	3	0	0	0	0	0	0	0	0	0	0	0	1	0	0	0	14	0	0	3	0	0	1	0	1	0	0
180	2-3	2.5	1	0	2	0	0	0	0	0	0	0	0	0	0	0	0	0	0	0	0	1	0	2	0	0	0	0	0	0	0	0	0	0	0	0	0	0	10	0	0	1	0	0	0	0	0	0	0
180	3-4	3.5	0	0	0	0	0	0	0	0	0	0	0	0	0	0	0	0	1	0	0	3	0	0	1	0	0	0	0	1	0	0	0	0	0	0	0	0	0	0	0	0	0	0	0	2	0	0	0
180	4-5	4.5	0	0	0	0	0	0	0	0	0	0	0	0	0	0	0	0	0	0	0	0	0	0	0	0	0	0	0	0	0	0	0	0	0	0	0	0	0	0	0	0	0	0	0	0	0	0	0
178	0-0.5	0.25	0	0	0	0	0	0	0	0	0	0	0	0	0	0	0	0	0	0	0	0	0	2	0	1	0	2	0	0	0	0	0	0	0	0	0	0	0	0	0	0	0	0	0	0	0	0	0
178	0.5-1	0.75	0	0	0	0	0	0	0	0	0	0	0	0	0	0	0	0	0	0	0	0	0	0	2	0	7	5	0	0	1	0	0	0	0	0	0	0	0	0	0	4	0	0	0	0	0	0	0
178	1-1-5	1.25	0	0	0	0	0	0	0	0	0	0	0	0	0	0	0	0	0	0	0	0	0	1	0	0	1	0	0	0	0	0	0	2	0	0	0	0	1	1	0	0	0	0	1	0	0	1	0
178	1.5-2	1.75	0	0	0	0	0	0	0	0	0	0	0	0	0	0	0	0	0	0	0	0	0	0	0	0	0	0	0	0	0	0	0	0	0	0	0	0	4	1	0	1	0	1	0	0	0	0	0
178	2-3	2.5	0	0	0	0	0	0	0	0	0	0	0	0	0	0	0	0	0	0	0	2	0	1	0	0	0	0	1	0	0	0	0	1	0	0	0	0	4	1	4	0	0	0	0	0	0	0	0
178	3-4	3.5	0	0	0	0	0	0	0	0	0	0	0	0	0	0	0	0	0	0	0	2	0	1	0	1	0	0	1	0	0	0	0	0	1	0	0	0	4	3	3	0	0	0	0	0	0	0	0
178	4-5	4.5	0	0	0	0	0	0	0	0	0	0	0	0	0	3	0	0	0	0	0	0	0	0	0	0	0	0	0	0	0	0	0	0	0	0	0	0	5	1	0	0	0	0	0	0	1	0	0
24	0-0.5	0.25	0	0	0	1	0	0	0	0	0	0	0	0	0	0	0	1	0	0	1	0	0	1	0	0	0	0	0	0	0	0	1	0	1	2	0	0	0	3	0	2	0	0	0	0	0	0	1
24	0.5-1	0.75	0	0	0	0	0	0	0	1	0	0	0	0	0	0	0	0	0	0	0	1	0	0	0	0	1	0	0	0	0	0	0	0	0	0	0	0	0	0	0	0	0	0	0	0	0	0	0
24	1-1-5	1.25	0	0	0	0	0	0	0	0	0	0	0	0	0	0	0	0	0	0	0	0	0	2	0	0	0	0	0	0	0	0	0	0	0	0	0	0	0	0	0	0	0	0	0	0	0	0	0
24	1.5-2	1.75	0	0	0	0	0	0	0	0	0	0	0	0	0	0	0	0	0	0	0	0	0	1	0	0	0	0	0	0	0	0	0	1	0	0	0	0	0	2	0	0	0	0	0	0	0	0	0
24	2-3	2.5	0	0	0	0	0	0	0	0	0	0	0	0	0	0	0	0	0	0	0	0	0	1	0	0	0	0	0	0	0	0	0	0	0	0	0	0	0	3	0	0	0	0	0	0	0	0	0
24	3-4	3.5	0	0	3	1	0	0	2	0	0	2	0	0	0	0	0	3	0	0	0	1	0	3	0	0	1	0	2	0	0	0	1	1	0	2	0	0	1	0	0	0	0	0	0	0	0	0	0
24	4-5	4.5	0	0	0	0	0	0	0	0	0	1	0	0	0	0	0	1	0	0	1	0	0	0	0	0	1	0	0	0	0	0	0	0	0	0	0	0	3	0	0	0	0	2	0	0	0	0	0
34	0-0.5	0.25	0	0	0	0	0	0	0	0	0	0	0	0	0	0	0	0	0	0	0	0	0	0	0	0	0	0	0	0	0	0	0	0	0	0	0	0	0	1	0	0	0	0	0	0	0	0	0
34	0.5-1	0.75	0	0	0	0	0	0	0	0	0	0	0	0	0	0	0	0	0	0	0	0	0	0	0	0	0	0	0	0	0	0	0	0	0	0	0	0	0	1	0	0	0	0	0	0	0	0	0
34	1-1-5	1.25	0	0	0	0	0	0	0	0	0	0	0	0	0	0	0	0	0	0	0	1	0	0	0	0	0	0	0	0	0	0	0	0	0	0	0	0	0	1	0	0	0	0	0	0	0	0	0
34	1.5-2	1.75	0	0	0	0	0	0	0	0	0	0	3	0	0	0	0	0	0	0	0	0	0	0	0	0	0	0	0	0	0	0	0	0	0	0	0	0	0	1	0	0	0	0	0	0	0	0	0
34	2-3	2.5	0	0	0	0	0	0	0	1	0	0	0	0	0	0	0	0	0	0	0	1	0	0	0	0	0	0	0	0	0	0	0	0	0	0	0	0	0	0	0	0	0	0	0	0	0	0	0
34	3-4	3.5	0	0	0	0	0	0	0	0	0	0	0	0	0	0	0	0	0	0	0	2	0	0	0	0	0	0	0	0	0	0	0	0	0	0	0	0	0	1	0	0	0	0	0	0	0	0	0
34	4-5	4.5	0	0	0	0	0	0	0	0	0	0	0	0	0	0	0	0	0	0	0	0	0	0	0	0	0	0	0	0	0	0	0	0	0	0	0	0	0	0	0	0	0	0	0	0	0	0	0
[truncated: 1 more columns]

## Sheet: Bio_comparable
Site	Depth	Astrononion antarcticus	Astrononion echolsi	Bolivinellina pseudopunctata	Cibicides refulgens	Ehrenbergina glabra	Epistominella exigua	Fissurina levigata	Globocassidulina biora	Cassidulinoides porrectus	Globocassidulina subglobosa	Globocassidulina spp.	Hopkinsina cf. pacifica	Hyalinometrion gracillimum	Melonis affinis	Nonionella bradii	Nonionella iridea	Pullenia quinqueloba	Robertina arctica	Stainforthia feylingi	Trifarina angulosa	Cornuspira planorbis	Miliammina arenacea	Miliolinellina sp.	Pyrgo depressa	Pyrgo oblonga	Pyrgo williamsoni	Quinqueloculina seminula	Quinqueloculina sp.	Quinqueloculina venusta	Triloculina tricamerata	Adercotryma glomeratum	Ammovertellina sp.	Cribrostomoides jeffreysii	Rhumblerella sp.	Glomospira charoides	Lagenammina difflugiformis	Nodulina dentaliniformis	Paratrochammina bartrami	Paratrochammina tricamerata	Portatrochammina antarctica	Psammosphaera fusca	Pseudobolivina antarctica	Recurvoides turbinatus	Reophax scorpiurus	Reophax subfusiformis	Trochammina sp.	Textularia aerlandii	Textularia antarctica
170	0.5	26	10	0	0	4	2	9	66	26	32	0	0	0	0	0	0	27	2	0	292	2	60	0	2	10	0	16	4	0	0	26	18	22	0	2	3	4	10	4	6	4	14	42	16	1	12	0	0
170	1.5	10	16	0	0	0	0	0	26	10	12	0	0	0	0	0	0	46	0	0	20	0	20	0	2	4	0	4	0	0	0	0	4	6	0	0	0	34	4	6	12	6	8	10	28	0	2	0	0
170	2.5	0	6	0	0	0	0	0	12	6	4	0	0	0	0	0	0	0	0	0	22	0	4	0	0	0	0	0	0	0	0	6	0	2	0	0	0	12	0	0	2	0	0	4	8	0	0	0	0
170	3.5	0	0	0	0	0	0	0	0	0	4	0	0	0	0	0	0	0	0	0	10	0	4	0	0	0	0	0	0	0	0	0	0	2	0	0	0	4	0	0	4	0	0	4	6	0	0	0	0
170	4.5	0	0	0	0	0	0	0	4	0	8	0	0	0	0	0	0	0	0	0	4	0	0	0	0	0	0	0	0	0	0	0	0	0	0	0	0	0	0	0	0	0	0	0	0	0	0	0	0
180	0.5	3	0	0	2	1	0	2	15	0	1	0	1	1	1	0	0	0	0	0	19	1	13	0	0	5	1	5	0	1	2	4	6	14	0	8	2	0	1	8	4	0	3	1	0	0	2	0	0
180	1.5	0	0	0	0	0	0	1	0	0	0	0	0	0	5	1	0	0	0	0	2	3	4	0	0	2	0	0	0	0	0	0	1	4	0	0	0	22	0	0	4	0	0	2	0	1	0	0	0
180	2.5	1	0	2	0	0	0	0	0	0	0	0	0	0	0	0	0	0	0	0	1	0	2	0	0	0	0	0	0	0	0	0	0	0	0	0	0	10	0	0	1	0	0	0	0	0	0	0	0
180	3.5	0	0	0	0	0	0	0	0	0	0	0	0	0	0	0	0	1	0	0	3	0	0	1	0	0	0	0	1	0	0	0	0	0	0	0	0	0	0	0	0	0	0	0	2	0	0	0	0
180	4.5	0	0	0	0	0	0	0	0	0	0	0	0	0	0	0	0	0	0	0	0	0	0	0	0	0	0	0	0	0	0	0	0	0	0	0	0	0	0	0	0	0	0	0	0	0	0	0	0
178	0.5	0	0	0	0	0	0	0	0	0	0	0	0	0	0	0	0	0	0	0	0	0	2	2	1	7	7	0	0	1	0	0	0	0	0	0	0	0	0	0	4	0	0	0	0	0	0	0	0
178	1.5	0	0	0	0	0	0	0	0	0	0	0	0	0	0	0	0	0	0	0	0	0	1	0	0	1	0	0	0	0	0	0	2	0	0	0	0	5	2	0	1	0	1	1	0	0	1	0	0
178	2.5	0	0	0	0	0	0	0	0	0	0	0	0	0	0	0	0	0	0	0	2	0	1	0	0	0	0	1	0	0	0	0	1	0	0	0	0	4	1	4	0	0	0	0	0	0	0	0	0
178	3.5	0	0	0	0	0	0	0	0	0	0	0	0	0	0	0	0	0	0	0	2	0	1	0	1	0	0	1	0	0	0	0	0	1	0	0	0	4	3	3	0	0	0	0	0	0	0	0	0
178	4.5	0	0	0	0	0	0	0	0	0	0	0	0	0	3	0	0	0	0	0	0	0	0	0	0	0	0	0	0	0	0	0	0	0	0	0	0	5	1	0	0	0	0	0	0	1	0	0	0
24	0.5	0	0	0	1	0	0	0	1	0	0	0	0	0	0	0	1	0	0	1	1	0	1	0	0	1	0	0	0	0	0	1	0	1	2	0	0	0	3	0	2	0	0	0	0	0	0	1	3
24	1.5	0	0	0	0	0	0	0	0	0	0	0	0	0	0	0	0	0	0	0	0	0	3	0	0	0	0	0	0	0	0	0	1	0	0	0	0	0	2	0	0	0	0	0	0	0	0	0	0
24	2.5	0	0	0	0	0	0	0	0	0	0	0	0	0	0	0	0	0	0	0	0	0	1	0	0	0	0	0	0	0	0	0	0	0	0	0	0	0	3	0	0	0	0	0	0	0	0	0	0
24	3.5	0	0	3	1	0	0	2	0	0	2	0	0	0	0	0	3	0	0	0	1	0	3	0	0	1	0	2	0	0	0	1	1	0	2	0	0	1	0	0	0	0	0	0	0	0	0	0	0
24	4.5	0	0	0	0	0	0	0	0	0	1	0	0	0	0	0	1	0	0	1	0	0	0	0	0	1	0	0	0	0	0	0	0	0	0	0	0	3	0	0	0	0	2	0	0	0	0	0	0
34	0.5	0	0	0	0	0	0	0	0	0	0	0	0	0	0	0	0	0	0	0	0	0	0	0	0	0	0	0	0	0	0	0	0	0	0	0	0	0	2	0	0	0	0	0	0	0	0	0	0
34	1.5	0	0	0	0	0	0	0	0	0	0	3	0	0	0	0	0	0	0	0	1	0	0	0	0	0	0	0	0	0	0	0	0	0	0	0	0	0	2	0	0	0	0	0	0	0	0	0	0
34	2.5	0	0	0	0	0	0	0	1	0	0	0	0	0	0	0	0	0	0	0	1	0	0	0	0	0	0	0	0	0	0	0	0	0	0	0	0	0	0	0	0	0	0	0	0	0	0	0	0
34	3.5	0	0	0	0	0	0	0	0	0	0	0	0	0	0	0	0	0	0	0	2	0	0	0	0	0	0	0	0	0	0	0	0	0	0	0	0	0	1	0	0	0	0	0	0	0	0	0	0
34	4.5	0	0	0	0	0	0	0	0	0	0	0	0	0	0	0	0	0	0	0	0	0	0	0	0	0	0	0	0	0	0	0	0	0	0	0	0	0	0	0	0	0	0	0	0	0	0	0	0

## Sheet: Eco_traits
Species	Test material
Adercotryma glomeratum	Agglutinated
Ammodiscus incertus	Agglutinated
Ammomarginalina ensis	Agglutinated
Ammovertellina sp.	Agglutinated
Cribrostomoides jeffreysii	Agglutinated
Cystammina paucicolata	Agglutinated
Glomospira charoides	Agglutinated
Hormosinella ovicula	Agglutinated
Lagenammina difflugiformis	Agglutinated
Lagenammina spp.	Agglutinated
Miliammina arenacea	Agglutinated
Nodulina dentaliniformis	Agglutinated
Paratrochammina bartrami	Agglutinated
Paratrochammina tricamerata	Agglutinated
Portatrochammina bipolaris	Agglutinated
Portatrochammina antarctica	Agglutinated
Psammosphaera fusca	Agglutinated
Pseudobolivina antarctica	Agglutinated
Pseudobulimina chapmani	Agglutinated
Pseudotrochammina arenacea	Agglutinated
Recurvoides spp.	Agglutinated
Recurvoides turbinatus	Agglutinated
Recurvoides contortus	Agglutinated
Reophax guttifer	Agglutinated
Reophax scorpiurus	Agglutinated
Reophax subfusiformis	Agglutinated
Reophax sp.	Agglutinated
Rhabdammina sp.	Agglutinated
Rhumblerella sp.	Agglutinated
Saccamina sp.	Agglutinated
Spiroplectammina biformis	Agglutinated
Trochammina sp.	Agglutinated
Textularia aerlandii	Agglutinated
Textularia antarctica	Agglutinated
Ioanella tumida	Calcareous
Astrononion antarcticus	Calcareous
Astrononion echolsi	Calcareous
Bolivinellina pseudopunctata	Calcareous
Cassidulinoides porrectus	Calcareous
Cibicides refulgens	Calcareous
Cibicides sp.	Calcareous
Cornuspira planorbis	Calcareous
Ehrenbergina glabra	Calcareous
Epistominella exigua	Calcareous
Fissurina aerlandii	Calcareous
Fissurina levigata	Calcareous
Fissurina spp.	Calcareous
Fursenkoina fusiformis	Calcareous
Globocassidulina biora	Calcareous
Globocassidulina spp.	Calcareous
Globocassidulina subglobosa	Calcareous
Glomospira charoides	Calcareous
Hyalinometrion gracillimum	Calcareous
Hopkinsina cf. pacifica	Calcareous
Lagena substriata elongata	Calcareous
Nonionella bradii	Calcareous
Melonis affinis	Calcareous
Melonis barleanum	Calcareous
Nonionella iridea	Calcareous
Oolina hexagona	Calcareous
Parafissurina fusiformis	Calcareous
Pullenia quinqueloba	Calcareous
Pullenia subcarinata	Calcareous
Pyrgo depressa	Calcareous
Pyrgo oblonga	Calcareous
Pyrgo elongata	Calcareous
Pyrgo williamsoni	Calcareous
Robertina arctica	Calcareous
Robertinoides spp.	Calcareous
Rosalina globularis	Calcareous
Quinqueloculina seminula	Calcareous
Quinqueloculina sp.	Calcareous
Miliolinellina sp.	Calcareous
Quinqueloculina venusta	Calcareous
Stainforthia concava	Calcareous
Stainforthia feylingi	Calcareous
Subfischerina sp.	Calcareous
Trifarina angulosa	Calcareous
Triloculina tricamerata	Calcareous
Usbekistania sp.	Calcareous
