# Supplementary material for: Community structures and taphonomic controls on benthic foraminiferal community from an Antarctic Fjord (Edisto Inlet, Victoria Land)
Source: Copernicus journal article supplement (doi:10.5194/bg-23-1137-2026), 2026-02-06
Supplement: Supplementary file 2 [file Geochemical_data.xlsx]

## Sheet: 210Pb_Activity
MUC	Top (cm)	Bottom (cm)	Mid depth (cm)	Extraction date (gg/mm/aaaa)	Date of end counting (gg/mm/aaaa)	Activity of 210Pb	Dv. Std of Acvtivity	210Pbex	years CE Before sampling	years CE
180	0	1	0.5	2024-05-27	2024-05-31	186624	11522	14862	6.8	2016
180	1	2	1.5	2024-09-17	2024-09-23	157192	8749	11919	20.5	2003
180	2	3	2.5	2024-05-27	2024-05-31	205568	15292	16757	34.1	1989
180	3	4	3.5	2024-09-17	2024-09-23	165364	12150	12736	47.8	1975
180	4	5	4.5	2024-05-27	2024-05-31	129164	8536	9116	61.4	1962
180	5	6	5.5	2024-09-17	2024-09-23	100639	6293	6264	75.1	1948
180	6	7	6.5	2024-05-27	2024-05-31	66536	6046	2854	88.7	1934
180	7	8	7.5	2024-09-17	2024-09-23	44337	2268	634	102.4	1921
180	8	9	8.5	2024-05-27	2024-05-31	28096	2893		116	1907
180	9	10	9.5	2024-09-17	2024-09-23	43752	3571	575	129.7	1893
180	10	11	10.5	2024-05-27	2024-05-31	45007	4733	701	143.3	1880
180	12	13	12.5	2024-05-27	2024-05-31	44874	5015	687	170.6	1852
180	13	14	13.5	2024-05-27	2024-05-31	37345	3516
178	0	1	0.5	2024-06-18	2024-06-26	338925	17345	30723	4.2	2019
178	2	3	2.5	2024-06-18	2024-06-26	195587	10209	16389	21.1	2002
178	4	5	4.5	2024-06-18	2024-06-26	126510	21825	9482	37.9	1985
178	6	7	6.5	2024-06-18	2024-06-26	137710	13449	10602	54.8	1968
178	8	9	8.5	2024-06-18	2024-06-26	86122	16153	5443	71.6	1951
178	10	11	10.5	2024-06-18	2024-06-26	57447	3287	2575	88.4	1935
178	12	13	12.5	2024-06-18	2024-06-28	41500	3653	981	105.3	1918
178	14	15	14.5	2024-06-18	2024-06-28	39845	2312	815	122.1	1901
178	16	17	16.5	2024-06-18	2024-06-28	34550	2053		139	1884
178	18	19	18.5	2024-06-18	2024-06-28	35358	1838		155.8	1867
178	20	21	20.5	2024-09-17	2024-09-30	24302	1358
178	21	22	21.5	2024-09-17	2024-09-30	32559	1318
170	0	1	0.5	2024-05-20	2024-05-24	269172	16535	22732	13.8	2009
170	1	2	1.5	2024-09-17	2024-09-23	233427	16595	19157	41.3	1982
170	2	3	2.5	2024-05-20	2024-05-24	203020	15033	16116	68.8	1954
170	3	4	3.5	2024-09-17	2024-09-23	114012	6923	7216	96.3	1927
170	4	5	4.5	2024-05-20	2024-05-24	88057	10931	462	123.8	1899
170	5	6	5.5	2024-09-17	2024-09-23	59919	3721	1806	151.3	1872
170	6	7	6.5	2024-05-20	2024-05-24	47081	2651	523	178.8	1844
170	8	9	8.5	2024-05-20	2024-05-24	42881	3866	103	233.8	1789
170	10	11	10.5	2024-05-20	2024-05-24	40829	2420		288.8	1734
34	0	1	0.5	2024-05-20	2024-05-24	295843	16245
34	4	5	4.5	2024-05-20	2024-05-24	159810	8373
34	8	9	8.5	2024-05-20	2024-05-27	169986	6713
34	12	13	12.5	2024-05-20	2024-05-27	274397	18343
34	16	17	16.5	2024-05-20	2024-05-27	235278	14814
34	20	21	20.5	2024-05-20	2024-05-27	250224	13090
34	24	25	24.5	2024-05-20	2024-05-27	270311	20211
34	28	29	28.5	2024-05-20	2024-05-27	267027	16447
34	32	33	32.5	2024-05-20	2024-05-27	247112	16039
34	34	35	34.5	2024-09-17	2024-09-26	168628	7362
34	36	37	36.5	2024-05-20	2024-05-27	101048	7588
34	39	40	39.5	2024-09-17	2024-09-26	125724	8971
34	40	41	40.5	2024-05-20	2024-05-29	197788	17170
34	44	45	44.5	2024-05-20	2024-05-29	103118	6709
34	48	49	48.5	2024-05-20	2024-05-29	198730	13276
34	52	53	52.5	2024-05-20	2024-05-29	100216	6463
34	53	54	53.5	2024-09-17	2024-09-26	145035	7318
24	0	1	0.5	2024-05-27	2024-06-03	384182	15873	33584	3	2020
24	2	3	2.5	2024-09-17	2024-09-26	281584	16318	23324	14.8	2008
24	4	5	4.5	2024-05-27	2024-06-03	205042	13074	1567	26.6	1996
24	8	9	8.5	2024-05-27	2024-06-03	146644	5613	983	50.3	1973
24	12	13	12.5	2024-05-27	2024-06-03	101764	6613	5342	73.9	1949
24	16	17	16.5	2024-05-27	2024-06-03	63960	5195	1562	97.6	1925
24	18	19	18.5	2024-09-17	2024-09-26	60155	3786	1181	109.4	1914
24	20	21	20.5	2024-05-27	2024-06-03	77670	4445		121.3	1902
24	22	23	22.5	2024-09-17	2024-09-26	51416	4457	308	133.1	1890
24	24	25	24.5	2024-05-27	2024-06-03	38837	1648		144.9	1878
24	28	29	28.5	2024-05-27	2024-06-03	53254	3933	491	168.6	1854
24	32	33	32.5	2024-05-27	2024-06-05	43455	5464		192.2	1831
24	36	37	36.5	2024-05-27	2024-06-05	48432	4079		215.9	1807
24	40	41	40.5	2024-05-27	2024-06-05	57669	8802		239.6	1783
24	44	45	44.5	2024-05-27	2024-06-05	45319	4386		263.2	1760

## Sheet: Environmental data
Site	Depth interval (cm)	Mid Point Depth (cm)	Sand (% g/g)	Magnetic susceptability	Dry density (gm / cm^3)	Water content (%)	Eh (mV)	OC (g/g)	Planktic Foraminifera (n/g)
34	0-1	0.5	8.23398	17	0.15	86.91	-422	0.811	9.81492
34	1-2	1.5	6.08931	7	0.11	90.27	-401	0.672	5.83998
34	2-3	2.5	4.09286	5	0.09	91.57	-454	0.591	2.47893
34	3-4	3.5	0.911982	3	0.08	92.21	-474	0.573	0
34	4-5	4.5	30.5922	3	0.08	92.39	-492	0.573	0.799552
24	0-1	0.5	0.405743	12	0.33	73.32	51	0.679	5.19706
24	1-2	1.5	14.2273	41	0.33	72.86	10	0.686	1.39369
24	2-3	2.5	12.5165	94	0.34	72.32	2	0.587	0.271577
24	3-4	3.5	11.7914	93	0.35	71.91	33	0.619	0
24	4-5	4.5	11.4153	84	0.34	72.35	-55	0.606	0
170	0-1	0.5	63.9251	560	1.11	32.86	67		0.625868
170	1-2	1.5	59.2272	619	1.18	30.5	-49		0
170	2-3	2.5	65.5476	645	1.26	27.99	-94		0.126772
170	3-4	3.5	60.8802	670	1.26	27.99	-98		0
170	4-5	4.5	65.9439	677	1.25	28.24	-110		0.0607264
178	0-1	0.5	28.9546	296	0.79	48.85	43		0.119888
178	1-2	1.5	27.6208	342	0.79	47.22	-73		0
178	2-3	2.5	24.9279	366	0.85	44.64	-118		0
178	3-4	3.5	27.2084	370	0.85	44.57	-122		0
178	4-5	4.5	30.8383	381	0.84	44.93	-134		0
180	0-1	0.5	54.1162	436	1.14	33.17	204	0.249	0.79074
180	1-2	1.5	51.7851	570	1.16	31.49	-74	0.284	0
180	2-3	2.5	58.698	585	1.16	31.61	-87	0.302	0
180	3-4	3.5	60.4449	648	1.19	30.38	-99	0.294	0
180	4-5	4.5	61.3908	675	1.23	29.05	-94	0.241	0.309893
