# Supplementary material for: Community structures and taphonomic controls on benthic foraminiferal community from an Antarctic Fjord (Edisto Inlet, Victoria Land)
Source: Copernicus journal article supplement (doi:10.5194/bg-23-1137-2026), 2026-02-06
Supplement: Supplementary file [file bg-23-1137-2026-supplement-title-page.pdf › bg-23-1137-2026-supplement-title-page.pdf]

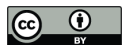

*Supplement of*

**Community structures and taphonomic controls on benthic foraminiferal community from an Antarctic Fjord (Edisto Inlet, Victoria Land)**

**Giacomo Galli et al.**

*Correspondence to:* Giacomo Galli (giacomo.galli@unive.it)

- bg-23-1137-2026-supplement-title-page.pdf
- SupMat\_Galli\_2025\_BioGeo\_V2
  - Code\_GallietAl.R
  - Foraminifera\_counts.xlsx
  - Geochemical\_data.xlsx
  - SupMat.docx

The copyright of individual parts of the supplement might differ from the article licence.
